# Supplementary material for: Diversity and functional specialization of oyster immune cells uncovered by integrative single-cell level investigations
Source: eLife. 2025 May 9;13:RP102622. doi: 10.7554/eLife.102622 (PMC12064177; doi:10.7554/eLife.102622)
Supplement: Supplementary file 1. — Metrics dashboard obtained after the STARsolo step, describing the quality of the sequencing and the various characteristics of the cells detected after aligning the reads to the C. gigas genome from the Roslin Institute. [file elife-102622-supp1.xlsx]

## Sheet: Sheet1
Number of Reads	127959215
Reads With Valid Barcodes	0.9703
Sequencing Saturation	0.7563
Q30 Bases in CB+UMI	0.9614
Q30 Bases in RNA read	0.9362
Reads Mapped to Genome: Unique+Multiple	0.8922
Reads Mapped to Genome: Unique	0.8201
Reads Mapped to Gene: Unique+Multiple Gene	0.7226
Reads Mapped to Gene: Unique Gene	0.7226
Estimated Number of Cells	2937
Unique Reads in Cells Mapped to Gene	67950796
Fraction of Unique Reads in Cells	0.7348
Mean Reads per Cell	23136
Median Reads per Cell	18145
UMIs in Cells	16306374
Mean UMI per Cell	5552
Median UMI per Cell	4412
Mean Gene per Cell	1578
Median Gene per Cell	1434
Total Gene Detected	23841
