# Supplementary material for: Diversity and functional specialization of oyster immune cells uncovered by integrative single-cell level investigations
Source: eLife. 2025 May 9;13:RP102622. doi: 10.7554/eLife.102622 (PMC12064177; doi:10.7554/eLife.102622)
Supplement: Supplementary file 3. — Gene Ontology (GO)-term enrichment analysis was conducted on specifically overexpressed genes in each cluster obtained after scRNA-seq processing (genes with Log2FC >0.25 and significant p-value <0.001) to highlight the most relevant GO-terms associated with a given gene list. The visualization of the different pathways can be obtained from the KEGG website using the KEGG prefix and KEGG number (https://www.genome.jp/kegg/pathway.html) [file elife-102622-supp3.xlsx]

## Sheet: KEGG_all_clusters
Cluster	KEGG Prefix	KEGG Number	KEGG Pathway	Fold Enrichment	P-value (<0.05)	Genes
1	crg	04144	Endocytosis	3.75	1.767e-06	G32465, G28245, G29411, G28554, G23342,G27546, G4677, G4248, G23299, G4679 G25017, G27834, G23833, G20650, G1765,G2151, G15227, G11863, G17437
1	crg	00030	Pentose phosphate pathway	10.19	4.254e-05	G30122, G34645, G20982, G31268, G25073 G11958, G17273
1	crg	00190	Oxidative phosphorylation	4.45	0.0003293	G20983, G16716, COX2, COX1, ND1 CYTB, G2226, G3525, G3658, ND5
1	crg	01200	Carbon metabolism	3.54	0.001771	G30122, G18442, G34645, G20982, G31268 G16805, G25073, G11958, G17273, G7839
1	crg	00010	Glycolysis / Gluconeogenesis	4.94	0.006575	G34645, G20982, G11958, G23780, G7839 G13028
1	crg	00620	Pyruvate metabolism	5.26	0.01379	G18442, G22426, G22427, G23780 G7839
1	crg	03266	Virion - Herpesvirus	8.74	0.04393	G22034, G32778 G32842
2	crg	03010	Ribosome	11.87	5.454e-27	G5571, G25192, G5077, G3494, G33210,G26985, G26901, G23358, G1703, G1900 G1543, G2172, G12279, G5185, G26391,G10525, G4452, G11817, G25420, G2853 G4635, G3304, G25620, G5649, G3526,G740, G24712, G26976, G25626, G15236 G34618, G34615, G18702
2	crg	04814	Motor proteins	3.64	0.0003616	G32475, G24506, G4572, G3088, G1531 G15286, G1299, G153, G22991, G1471 G10110, G1470
2	crg	00980	Metabolism of xenobiotics by cytochrome P450	4.61	0.02165	G5106, G26659, G18623, G18624 G14458
3	crg	00190	Oxidative phosphorylation	8.03	1.468e-12	G31970, G3073, G5034, G3298, G5653,G27276, G25266, G650, G331, G23645 G1779, G16296, G23701, G13193, G27816,G10181, G15131, G21371, G2133, G34736
3	crg	01200	Carbon metabolism	5.42	4.818e-08	G26194, G5034, G4037, G3500, G20764,G16296, G23701, G14096, G22912, G15171 G27816, G21794, G19054, G15078, G16455,G34649, G9692
3	crg	00010	Glycolysis / Gluconeogenesis	7.41	5.014e-06	G26194, G14096, G22912, G21794, G19054 G15078, G4037, G3500, G34649, G12763
3	crg	01230	Biosynthesis of amino acids	5.77	1.412e-05	G26194, G14096, G22912, G21794, G4037,G25300, G34649, G7042, G25304, G9692 G20764
3	crg	04144	Endocytosis	3.2	3.215e-05	G10612, G34830, G4232, G31680, G28015,G28554, G2650, G35288, G23530, G22892 G3216, G2800, G22524, G25627, G21676,G20683, G1765, G11863
3	crg	00020	Citrate cycle (TCA cycle)	8.23	0.000148	G16296, G23701, G5034, G15171, G27816 G19054, G16455
3	crg	01100	Metabolic pathways	1.27	0.01482	G13605, G5034, G3012, G3298, G650,G331, G22961, G5758, G14096, G27816 G13000, G2033, G4037, G3500, G34394,G23387, G25763, G20764, G1779, G23701 G13193, G21533, G15171, G19054, G15131,G1375, G21371, G12861, G9692, G3073 G8883, G31970, G30520, G25177, G27276,G5653, G16296, G2133, G16455, G34649 G7042, G9342, G26194, G23482, G6556,G23164, G5106, G25300, G25266, G25304 G23645, G25904, G22912, G21794,…
3	crg	00250	Alanine, aspartate and glutamate metabolism	4.26	0.02785	G23164, G25300, G25763, G25304 G20764
3	crg	00430	Taurine and hypotaurine metabolism	5.05	0.04232	G23482, G34394, G25763 G9342
4	crg	03010	Ribosome	11.18	2.38e-62	G32202, G25192, G4582, G5077, G3494,G33210, G33255, G5115, G5555, G11948 G31071, G23694, G4502, G732, G1703,G1900, G21588, G18212, G1543, G28190 G12279, G13687, G28274, G10525, G7023,G27586, G3387, G11817, G26894, G4635 G3304, G2853, G24036, G5649, G24712,G26976, G1172, G12546, G27592, G11965 G5571, G4085, G5375, G5652, G23471,G32582, G26985, G26901, G23358, G18432 G16773, G21360, G10473, G2172, …
4	crg	03050	Proteasome	9.09	3.162e-14	G11447, G11879, G9178, G28086, G6441,G27078, G6503, G27105, G4954, G21626 G1667, G22517, G11085, G13469, G32646,G1140, G29381, G12565, G30766, G34613
4	crg	03040	Spliceosome	4.6	1.618e-13	G30069, G23072, G3035, G27237, G4644,G67, G3357, G28826, G21225, G22448 G21463, G20152, G31757, G12256, G16599,G2099, G16114, G11265, G19821, G5284 G4177, G23063, G3388, G35242, G23100,G2896, G5803, G21555, G22119, G18742 G13575, G14401, G10466
4	crg	00190	Oxidative phosphorylation	3.14	0.0003879	G31970, G3077, G3298, G26024, G34551,G11926, G27610, G650, G2799, G17080 G1779, G1500, ND3, G31998
4	crg	03015	mRNA surveillance pathway	3.18	0.001097	G21555, G1768, G21245, G23072, G3035,G1892, G27237, G22452, G12561, G11265 G19821, G15119
4	crg	03013	Nucleocytoplasmic transport	2.44	0.00912	G21555, G1768, G23072, G4818, G3035,G2485, G31807, G27237, G12561, G11265 G19821, G27008
4	crg	04141	Protein processing in endoplasmic reticulum	2.06	0.01279	G11932, G29430, G10911, G22082, G26491,G29962, G2451, G2694, G6732, G4985 G20713, G204, G20332, G2609, G10994
5	crg	03010	Ribosome	7.41	1.68e-12	G27592, G32202, G5185, G5375, G33210,G27586, G11948, G26985, G3885, G26894 G3304, G2853, G18212, G18432, G16773,G1543, G16242, G21360, G13687, G2172 G12279
5	crg	00190	Oxidative phosphorylation	4.59	0.0006307	G3430, COX2, COX1, ND1, CYTB ND3, ND2, ND5, ND4
5	crg	04137	Mitophagy - animal	4.65	0.008536	G30487, G25784, G29415, G3710, G22696 G12500
6	crg	03010	Ribosome	16.48	2.256e-55	G32202, G25192, G4582, G3494, G5115,G5555, G11948, G4502, G732, G1703 G21588, G18212, G1543, G28190, G12279,G13687, G10525, G7023, G27586, G3387 G11817, G26894, G4635, G3304, G2853,G24036, G5649, G24712, G26976, G27592 G5571, G4085, G5652, G26985, G26901,G23358, G18432, G16773, G21360, G10473 G2172, G5185, G26391, G3885, G25420,G25620, G740, G2636, G25626, G16242 G15236, G34618, G34615, G18702
7	crg	04144	Endocytosis	4.04	4.914e-09	G10612, G23299, G27538, G22524, G12273,G16951, G2151, G3185, G6211, G13317 G2450, G31680, G4232, G28015, G2650,G35288, G23342, G20567, G17254, G18762 G19412, G21991, G1774, G1993, G30759
7	crg	04137	Mitophagy - animal	4.99	0.0003501	G18587, G25784, G11088, G2334, G30759 G3710, G27737, G30997, G12500
7	crg	04145	Phagosome	2.82	0.001883	G3185, G22181, G3430, G28015, G24310,G17795, G14056, G2026, G1780, G30759 G32778, G32842, G90
7	crg	04140	Autophagy - animal	2.97	0.003467	G20344, G5397, G25608, G25784, G11385,G2024, G11088, G30759, G10907, G21965 G12500
7	crg	04310	Wnt signaling pathway	2.9	0.006822	G24405, G23180, G11208, G35235, G16231 G2024, G14136, G2334, G1780, G2797
7	crg	04142	Lysosome	1.92	0.04514	G11645, G5397, G22181, G3430, G2026,G27524, G18705, G26324, G16202, G2976 G27526, G23337
