# Supplementary material for: Diversity and functional specialization of oyster immune cells uncovered by integrative single-cell level investigations
Source: eLife. 2025 May 9;13:RP102622. doi: 10.7554/eLife.102622 (PMC12064177; doi:10.7554/eLife.102622)
Supplement: Supplementary file 6. — For each cell type in each fraction, the table presents the average percentage, standard deviation, standard error, minimum, maximum, and median count values. [file elife-102622-supp6.xlsx]

## Sheet: Sheet1
Fraction	Cells	Average	Std.Dev.	Std.Error	Min	Max		Fraction	Cells	Average	Std.Dev.	Std.Error	Min	Max
1	H	46.43	9.47	4.73	37.5	59.63		5	H	4.29	4.41	2.21	0.76	10.45
1	ML	20.26	9.09	4.55	7.34	28.38		5	ML	19.67	12.04	6.02	3.03	30.88
1	BBL	14.47	2.29	1.15	12.16	16.5		5	BBL	3.56	1.91	0.95	1.49	6.06
1	ABL	15.5	4.94	2.47	8.11	18.35		5	ABL	3.35	2.12	1.06	0.75	5.88
1	G	0.35	0.44	0.22	0	0.92		5	G	40.92	7.31	3.66	33.82	49.24
1	BGC	0.38	0.75	0.38	0	1.5		5	BGC	4.5	2.98	1.49	1.47	8.33
1	VC	2.62	1.97	0.98	0.92	5.41		5	VC	23.71	4.48	2.24	17.91	28.79
Fraction	Cells	Average	Std.Dev.	Std.Error	Min	Max		Fraction	Cells	Average	Std.Dev.	Std.Error	Min	Max
2	H	20.17	5.26	2.63	14.1	26.56		6	H	3.57	3.82	1.91	0.65	9.09
2	ML	27.64	4.48	2.24	22.79	33.33		6	ML	13.95	4.91	2.45	7.1	18.18
2	BBL	27.21	9.94	4.97	16.22	39.71		6	BBL	1.19	1.38	0.69	0	2.58
2	ABL	20.17	2.36	1.18	16.91	22.52		6	ABL	1.54	0.65	0.33	0.65	2.17
2	G	1.14	0.79	0.39	0	1.8		6	G	68	10.11	5.06	58.7	78.46
2	BGC	1.03	1.26	0.63	0	2.56		6	BGC	1.69	1.99	1	0	3.87
2	VC	2.64	1.56	0.78	0.74	4.5		6	VC	10.06	5.3	2.65	3.08	15.94
Fraction	Cells	Average	Std.Dev.	Std.Error	Min	Max		Fraction	Cells	Average	Std.Dev.	Std.Error	Min	Max
3	H	12.49	3.78	1.89	10.08	18.04		7	H	2.43	3.04	1.52	0	6.31
3	ML	28.26	8.9	4.45	17.12	38.66		7	ML	8.5	6.35	3.18	1.93	17.05
3	BBL	21.18	3.11	1.55	16.89	24.32		7	BBL	1.67	1.51	0.75	0	3.38
3	ABL	17.71	5.78	2.89	11.86	25.21		7	ABL	0.36	0.72	0.36	0	1.45
3	G	7.96	5.3	2.65	3.09	14.41		7	G	81.18	8.99	4.49	68.18	88.41
3	BGC	4.71	4.16	2.08	0	10.14		7	BGC	2.68	1.5	0.75	0.9	4.55
3	VC	7.68	2.87	1.43	4.2	10.81		7	VC	3.18	2.92	1.46	0	6.82
Fraction	Cells	Average	Std.Dev.	Std.Error	Min	Max
4	H	7.82	5.97	2.99	2.2	14.29
4	ML	32.69	13.33	6.66	19.34	50.82
4	BBL	9.64	3.4	1.7	4.76	12.3
4	ABL	5.37	0.97	0.48	4.42	6.67
4	G	18.29	10.39	5.19	5.74	30.94
4	BGC	3.9	1.51	0.76	2.2	5.71
4	VC	22.29	8.25	4.12	11.48	30.77
