# Supplementary material for: Diversity and functional specialization of oyster immune cells uncovered by integrative single-cell level investigations
Source: eLife. 2025 May 9;13:RP102622. doi: 10.7554/eLife.102622 (PMC12064177; doi:10.7554/eLife.102622)
Supplement: Supplementary file 7. — Transcription factors identified in the scRNA-seq dataset and their homology with human proteins, as indicated by the blast alignment results. Each entry includes the gene identifier, the protein it represents in C.gigas, and its human counterpart. The bit score and coverage indicate the strength and extent of the alignment, respectively. [file elife-102622-supp7.xlsx]

## Sheet: Sheet1
			Blast alignment results						Homo sapiens Homologs
Gene Number	Annotation Name	TF Name	Best Hit Blast Name	Specie	Accession number	Bit Score	Percentage Identity	Coverage	Name	Uniprot Number
G29966	Krueppel-like factor 15	CgKLF6	Krueppel-like factor 6	C.gigas	XP_011428991	659.448	100	100	HsKLF8	O95600
G30997	BHLH domain-containing protein	CgTFEB	Transcription factor EC isoform X1	C.gigas	XP_011447558	1089.72	100	100	HsTFEB	P19484
G17147	BZIP domain-containing protein	CgCR3L1	cAMP-responsive element-binding protein 3-like protein 1 isoform 1	H.sapiens	NP_443086	1060.06	100	100	HsCR3L2	Q70SY1
G3043	Transcriptional regulator	CgMYC	Transcriptional regulator Myc-A-like	C.angulata	XP_052688275	548.128	100	100	HsMYC	P01106
G31054	GATA-binding factor 3	CgGATA3	Transcription factor GATA-3 isoform X1	C.gigas	XP_011412780	966.066	100	100	HsGATA2	P23769
G11196	BZIP domain-containing protein	CgFOS	Proto-oncogene c-Fos	C.gigas	XP_011446784	664.84	100	100	HsATF3	P18847
G10637	BZIP domain-containing protein	CgFOS2	Fos-related antigen 2	C.gigas	XP_011439871	271.937	100	100	HsATF4	P18848
G2123	SPRY domain-containing SOCS box protein 3	CgSOCS3	SPRY domain-containing SOCS box protein 3	C.gigas	XP_011413771	488.804	100	100	HsSPSB4	Q96A44
G1067	BZIP domain-containing protein	none	uncharacterized protein LOC105347143	C.gigas	XP_019930445.2	1419.35	100	100	none	none
G1708	SoxE	CgSOX8	Transcription factor Sox-8-like	C.gigas	NP_001295801	947.192	99.8	100	HsSOX9	P48436
G3506	BZIP domain-containing protein	CgATF5	cAMP-dependent transcription factor ATF-4	C.gigas	XP_011439092	566.614	85.9	100	HsATF5	Q9Y2D1
G27827	BHLH domain-containing protein	CgUSF2	Upstream stimulatory factor 2-like isoform X4	C. angulata	XP_052673994	605.905	100	99.68	HsUSF2	Q15853
G11198	BZIP domain-containing protein	CgFOS3	Fos-related antigen 1	C.gigas	XP_034323853	456.062	100	99.62	none	none
G31522	Helix-loop-helix protein 1	none	uncharacterized protein LOC105333018 isoform X2	C. gigas	XP_011434110	377.096	100	99.45	none	none
G10636	BZIP domain-containing protein	CgATF1	Basic leucine zipper transcriptional factor ATF-like isoform X1	C.gigas	XP_011439867	270.011	100	99.41	none	none
G13555	BZIP domain-containing protein	CgJUNB	Transcription factor jun-B isoform X1	C.gigas	XP_011440881	224.557	100	99.33	none	none
G21091	X-box binding protein like protein	CgXBOX	X-box binding protein-like protein	C.ariakensis	AEF33390	375.491	80.5	99.12	none	none
G12164	Estrogen receptor	CgRXRB	Estrogen receptor beta	C.gigas	XP_011424805	1395.56	100	98.79	HsRXRA	P19793
G748	Interferon regulatory factor	CgIRF1	Interferon regulatory factor 1 isoform X1	C.gigas	XP_011449592	802.742	100	95.51	HsIRF1	P10914
G5204	ETS-related transcription factor Elf-3	CgELF3	ETS homologous factor isoform X1	C.gigas	XP_034310128	883.248	100	95.25	HsELF3	P78545
G28398	ETS domain-containing protein	CgELK3	ETS domain-containing protein Elk-3 isoform X1	C.gigas	XP_011421195	753.051	100	93.91	HsELK3	P41970
G35512	cAMP-responsive element modulator	CgCREM	cAMP-responsive element modulator isoform X2	C.gigas	XP_011448206	572.778	100	92.79	HsCREB1	P16220
G11013	BZIP domain-containing protein	CgTEF	Thyrotroph embryonic factor-like	C.virginica	XP_022332233	570.466	86.4	85.1	HsTEF	Q10587
G7003	ETS-related transcription factor Elf-4	CgELF2	ETS-related transcription factor Elf-2	C.gigas	XP_011447491	523.857	99.6	84.54	HsELF1	P32519
G27920	LIM domain transcription factor LMO4.1	CgLMO4	LIM domain transcription factor LMO4.1 isoform X2	C.gigas	XP_011443581	319.316	98.2	81.86	HsLMO4	P61968
G10865	BZIP domain-containing protein	CgVBP	Transcription factor VBP	C.gigas	XP_011457057	438.343	100	77.95	HsHLF	Q16534
G35439	BZIP domain-containing protein	CgCEBPG	CCAAT/enhancer-binding protein beta	C.gigas	XP_011452433	442.195	100	75.61	HsCEBPG	P53567
G2334	Proto-oncogene c-Jun	CgJUN	Transcription factor AP-1	C.gigas	XP_034313954	429.098	100	58.31	HsJUN	P05627
G26127	Krueppel-like factor 5	CgKLF5	Krueppel-like factor 5 isoform X1	C.gigas	XP_011421316	905.975	100	57.28	HsKLF7	O75840
G20682	cAMP-responsive element-binding protein-like 2	CgCRBL1	cAMP responsive element binding protein-like, partial	C.gigas	AAU93879	318.546	99.4	56.83	HsCRBL2	O60519
G17294	Runt-related transcription factor 1	CgRUNX1	Runt-related transcription factor 1-like isoform X5	C.angulata	XP_052711215	1085.86	100	56.68	HsRUNX3	Q13761
G10077	BZIP domain-containing protein	CgCR3L4	Clumping factor A isoform X1	C.gigas	XP_011425092	775.393	100	56.11	HsCR3L3	Q68CJ9
G2021	BHLH domain-containing protein	CgTAL1	T-cell acute lymphocytic leukemia protein 1-like isoform X1	C.gigas	XP_011439324	394.045	100	49.23	HsTAL2	Q16559
G2933	Putative transcription factor SOX-14	CgSOX11	Transcription factor Sox-11	C.gigas	XP_011445203	424.091	100	43.97	HsSOX12	O15370
G11358	BZIP domain-containing protein	CgGIANT	Protein giant	C.gigas	XP_011417277	486.108	100	38.41	HsTEF	Q10587
G6354	ETS domain-containing protein	CgPU.1	ETS-related transcription factor Elf-3	C.gigas	XP_034320185	189.119	100	36	HsPU.1	P17947
G10633	BZIP domain-containing protein	CgFOS1	Fos-related antigen 1	C.gigas	XP_019918193	371.719	99.5	31.4	HsFOSL1	P15407
G6394	ETS domain-containing protein	CgSPDEF	SAM pointed domain-containing Ets transcription factor-like isoform X2	C.gigas	XP_052697855	356.681	99.4	30.12	HsSPDEF	O95238
G32716	cAMP-responsive element-binding protein-like 2	CgCRBL2	cAMP-responsive element-binding protein-like 2 isoform X1	C.gigas	XP_034309865	297.745	83.4	26.7	HsCRBL2	O60519
