# Supplementary material for: Diversity and functional specialization of oyster immune cells uncovered by integrative single-cell level investigations
Source: eLife. 2025 May 9;13:RP102622. doi: 10.7554/eLife.102622 (PMC12064177; doi:10.7554/eLife.102622)
Supplement: Supplementary file 8. — Name of the transcript targeted by the primer pair, name of the primer used in this study, and nucleotide sequence of each primer. [file elife-102622-supp8.xlsx]

## Sheet: Sheet1
Target	Primer name	Sequence
Laccase 24	LACC24-F	CCT-TGA-TTC-TTC-TTG-CCA-TCC-G
	LACC24-R	AAA-GCT-TGC-GAT-CTT-TGG-CAA
C-type lectin domain-containing protein	CLEC-F	ATC-GGC-TTC-TAC-ATG-GAC-TGA-C
	CLEC-R	GTG-TCT-AAA-GCT-GCG-CCG-AT
Putative modulator of levamisole receptor-1	LEVAR-F	GTG-ACA-GAC-TTC-CCT-CAC-CCT
	LEVAR-R	GCA-CTG-AGT-CGA-GTC-GTA-TGT
EGF-like domain-containing protein 8	EGFL-F	GAG-TGT-TTG-ACA-GGA-CGA-AGC
	EGFL-R	CAT-CAT-CGT-TTC-CAA-CTG-AGG-C
X-Box binding protein-like domain	XBOX-F	GGG-TCA-ACA-GTG-CTA-GGC-AAT
	XBOX-R	GTA-AGC-CAC-CAT-CCC-TAC-CAC
Transglutaminase-like domain containing protein	TGC-F	CTA-CAA-GCT-GGA-CAC-CAC-CAA
	TGC-R	GCA-TTG-ACC-AGT-GAC-ACA-GTC
MD-2-related lipid-recognition domain containing protein	MLDP-F	CTT-GGA-CCT-CGT-TAT-CTT-CGC
	MLDP-R	CTC-CCT-CTG-GTC-CAC-AAA-CAA
High mobility group protein B1	HMGB1	GCC-CAC-GCT-GAA-CTA-TAC-AAG
	HMGB1	CAC-CTT-GTA-GTC-CCT-GAG-TGG
Galectin	GAL-F	CCA-CAG-TAT-CAA-CGA-CCC-TCC
	GAL-R	TCA-CTA-CCG-TCA-TAG-GGA-CCG
Cubilin	CUBN-F	TAA-GTT-CAC-TCT-GGC-CCA-AGG
	CUBN-R	GCT-CAT-GAT-CGT-AGT-GGT-GCT
Natterin-1	NAT1-F	CCG-TAC-GAT-GGT-GAG-GAG-AAA
	NAT1-R	CCG-TCC-CAC-ATA-CTT-GTC-GTT
Caveolin	CAV-F	TCC-AAA-TGA-CCA-TGA-CCC-AGA
	CAV-R	ACT-CTA-TTC-TTG-GTC-GCC-TGG
G Protein receptor F1-2 domain-containing protein	GPROT-F	CGA-ACG-CCT-GCT-TCT-GAT-ATG
	GPROT-R	TCC-ACA-TCG-AAT-GCT-CTG-TCT
DBH-like monooxygenase protein 1	MOX-F	CCT-CCG-CAG-CAA-GAA-GAA-GTA
	MOX-R	TTC-TGT-TTC-GTC-CTC-TCC-ACG
Ribosomal protein S6	RPS6-F	CAG-AAG-TGC-CAG-CTG-ACA-GTC
	RPS6-R	AGA-AGC-AAT-CTC-ACA-CGG-AC
Big Defensin 1&2	BigDef1-2-F	TTC-GCC-TGC-TTC-CAT-ACT-GG
	BigDef1-2-R	GTC-ATG-GTC-ACT-CCT-TAT-TC
Hemocyte defensin	HemDef-F	CTA-CCA-GTT-GTT-CAT-ACA-GAG
	HemDef-R	TCT-TGG-TCA-GAT-TCA-GTC-TGG
Bactericidal Permeability Increasing Protein	BPI	GGA-GGC-GGA-AAT-GGA-TTA-CT
	BPI	TGG-TTG-ACA-TCG-TTG-CTG-AC
